# Supplementary material for: Samarium(ii) iodide-mediated intramolecular pinacol coupling reactions with cyclopropyl ketones
Source: Royal Society of Chemistry journal article supplement (doi:10.1039/b712542a), 2007-01-01
Supplement: b712542a.pdf [file b712542a.pdf]

## Samarium(II) iodide-mediated intramolecular pinacol coupling reactions with cyclopropyl ketones

Sarah L. Foster, Sandeep Handa,\* Michael Krafft and David Rowling

Department of Chemistry, University of Leicester, Leicester, LE1 7RH, UK.

### Supporting Information

#### General Methods

All reactions were performed under an inert atmosphere of nitrogen (or argon for SmI<sub>2</sub>-mediated reactions) in flame dried glassware unless otherwise stated. THF was dried by distillation from sodium-benzophenone, CH<sub>2</sub>Cl<sub>2</sub> was distilled from CaH<sub>2</sub>. All other reagents and solvents were purified by standard procedures.<sup>1</sup> SmI<sub>2</sub> solutions were prepared from Sm and CH<sub>2</sub>I<sub>2</sub> using degassed (freeze-pump-thaw) THF immediately prior to use.<sup>2</sup> NMR spectra were recorded using a Bruker AM 300 spectrometer. Chemical shifts are reported in parts per million downfield from TMS and using residual protic solvent as an internal standard. *J* coupling constants are reported in Hz.

#### *N*-(2-Cyclopropylallyl)-*N*-(2-methylallyl)-4-toluenesulfonamide

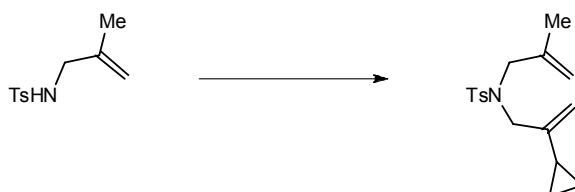

Sodium hydride (95%, 43 mg, 1.70 mmol) was added to a solution of *N*-(2-methylallyl)-4-toluenesulfonamide<sup>3</sup> (337 mg, 1.5 mmol) in dry DMF (10 ml). The reaction was stirred for 15 min and then a solution of (2-cyclopropylallyl) toluenesulfonate<sup>4</sup> (280 mg, 1.11 mmol) in THF (2 ml) added dropwise. After 18 h the reaction mixture was poured into saturated aqueous ammonium chloride (10 ml) and water (10 ml) and extracted with EtOAc (3 × 20 ml). The combined extracts were dried (MgSO<sub>4</sub>) and evaporated under reduced pressure to leave the crude product, which was purified by flash column chromatography on silica using petrol:diethyl ether (70:30) to give the title compound (287 mg, 85%) as a colourless oil.

$\delta_{\text{H}}$  (300 MHz, CDCl<sub>3</sub>) 0.35-0.40 (2H, m), 0.55-0.61 (2H, m), 1.13-1.22 (1H, m), 1.61 (3H, s, CH<sub>3</sub>C=CH<sub>2</sub>), 2.41 (3H, s, Ar-CH<sub>3</sub>), 3.75 (2H, s, NCH<sub>2</sub>), 3.82 (2H, s, NCH<sub>2</sub>), 4.68 (2H, s, 2 of C=CH<sub>2</sub>), 4.78 (1H, s, 1 of C=CH<sub>2</sub>), 4.85 (1H, s, 1 of C=CH<sub>2</sub>), 7.27 (2H, d, *J* 8.1, 2 × Ar-*H*), 7.70 (2H, d, *J* 8.1, 2 × Ar-*H*).

$\delta_{\text{C}}$  (62.9 MHz, CDCl<sub>3</sub>) 6.8 (2 × CH<sub>2</sub>), 13.7 (CH), 20.0 (CH<sub>3</sub>), 21.5 (CH<sub>3</sub>), 52.3 (CH<sub>2</sub>), 53.1 (CH<sub>2</sub>), 109.7 (CH<sub>2</sub>), 114.5 (CH<sub>2</sub>), 127.3 (2 × CH), 129.7 (2 × CH), 137.7 (C), 140.2 (C), 143.0 (C), 145.5 (C).

$\nu_{\text{max}}$  (cm<sup>-1</sup>, film) 3081, 2922, 1657, 1598, 1322, 1155.

*m/z* (FAB) 306.1527 (MH<sup>+</sup>. C<sub>17</sub>H<sub>24</sub>NO<sub>2</sub>S requires 306.1528)

#### *N,N*-bis(2-Cyclopropylallyl)-4-toluenesulfonamide

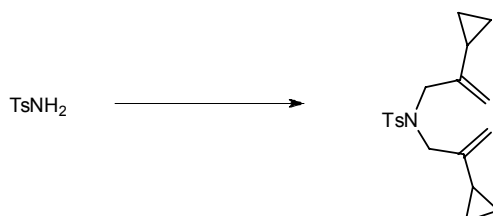

Using the same procedure as above, sodium hydride (95%, 55 mg, 2.17 mmol) was reacted with 4-toluenesulfonamide (170 mg, 1.0 mmol) and (2-cyclopropylallyl) toluenesulfonate<sup>4</sup> (479 mg, 1.9 mmol) to give the title compound (314 mg, 69%) as a colourless oil.

$\delta_{\text{H}}$  (300 MHz,  $\text{CDCl}_3$ ) 0.35-0.42 (4H, m), 0.54-0.61 (4H, m), 0.83-0.90 (2H, m), 2.41 (3H, s, Ar- $\text{CH}_3$ ), 3.87 (4H, s,  $2 \times \text{NCH}_2$ ), 4.68 (4H, brs,  $2 \times \text{C}=\text{CH}_2$ ), 7.26 (2H, d,  $J$  8.1,  $2 \times$  Ar- $\text{H}$ ), 7.73 (2H, d,  $J$  8.1,  $2 \times$  Ar- $\text{H}$ ).

$\delta_{\text{C}}$  (62.9 MHz,  $\text{CDCl}_3$ ) 3.9 ( $4 \times \text{CH}_2$ ), 13.7 ( $2 \times \text{CH}$ ), 21.5 ( $\text{CH}_3$ ), 52.3 ( $2 \times \text{CH}_2$ ), 109.9 ( $2 \times \text{CH}_2$ ), 127.8 ( $2 \times \text{CH}$ ), 129.6 ( $2 \times \text{CH}$ ), 137.7 (C), 140.1 ( $2 \times \text{C}$ ), 143.0 (C).

$\nu_{\text{max}}$  ( $\text{cm}^{-1}$ , film) 3083, 2923, 1645, 1598, 1339, 1156.

$m/z$  (FAB) 332.1684 ( $\text{MH}^+$ .  $\text{C}_{19}\text{H}_{26}\text{NO}_2\text{S}$  requires 332.1684)

### ***N*-(Butyl)-*N*-(2-cyclopropylallyl)-4-toluenesulfonamide**

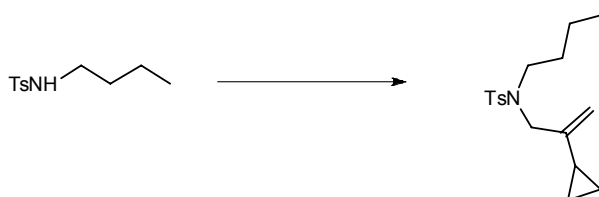

Using the same procedure as above, sodium hydride (95%, 44 mg, 1.72 mmol) was reacted with *N*-butyl-4-toluenesulfonamide (332 mg, 1.46 mmol) and (2-cyclopropylallyl) toluenesulfonate<sup>4</sup> (337 mg, 1.33 mmol) to give the title compound (377 mg, 92%) as a colourless oil.

$\delta_{\text{H}}$  (300 MHz,  $\text{CDCl}_3$ ) 0.42-0.40 (2H, m), 0.63-0.69 (2H, m), 0.87 (3H, t,  $J$  7.2,  $\text{CH}_3\text{CH}_2$ ), 1.22 (2H, app sextet,  $J$  7.2,  $\text{CH}_3\text{CH}_2$ ), 1.29-1.36 (1H, m), 1.41-1.49 (2H, m), 2.43 (3H, s, Ar- $\text{CH}_3$ ), 3.15 (2H, t (2<sup>nd</sup> order),  $J$  7.2,  $\text{NCH}_2\text{CH}_2$ ), 3.79 (2H, s,  $\text{NCH}_2$ ), 4.69 (1H, brs,  $\text{C}=\text{CHH}$ ), 4.78 (1H, brs,  $\text{C}=\text{CHH}$ ), 7.30 (2H, d,  $J$  8.3,  $2 \times$  Ar- $\text{H}$ ), 7.73 (2H, d,  $J$  8.3,  $2 \times$  Ar- $\text{H}$ ).

$\delta_{\text{C}}$  (62.9 MHz,  $\text{CDCl}_3$ ) 7.2 ( $2 \times \text{CH}_2$ ), 13.4 ( $\text{CH}_3$ ), 13.7 (CH), 20.0 ( $\text{CH}_2$ ), 21.5 ( $\text{CH}_3$ ), 30.1 ( $\text{CH}_2$ ), 47.7 ( $\text{CH}_2$ ), 53.8 ( $\text{CH}_2$ ), 109.3 ( $\text{CH}_2$ ), 127.1 ( $2 \times \text{CH}$ ), 129.6 ( $2 \times \text{CH}$ ), 137.1 (C), 143.0 (C), 146.4 (C).

$\nu_{\text{max}}$  ( $\text{cm}^{-1}$ , film) 3083, 2959, 1645, 1599, 1337, 1156.

$m/z$  (FAB) 308.1684 ( $\text{MH}^+$ .  $\text{C}_{17}\text{H}_{26}\text{NO}_2\text{S}$  requires 308.1684)

### **General Procedure for the ozonolysis reactions**

Ozone was bubbled through a stirred solution of the alkene (1 equiv.) in dry methanol (5-10 ml) at  $-78^\circ\text{C}$  until a pale blue colour was observed. Nitrogen was then bubbled through until the solution turned colourless.  $\text{Me}_2\text{S}$  (5 equiv.) was added and the reaction allowed to warm to room temperature and stirred for a further 18 h. All volatiles were removed by evaporation under reduced pressure to give the ketones **1-3** in sufficient purity for the next step.

### ***N*-(2-Cyclopropyl-2-oxoethyl)-*N*-(2-oxopropyl)-4-toluenesulfonamide (1)**

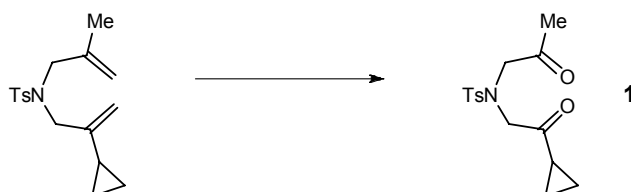

The general ozonolysis procedure gave **1** in 93% yield as a colourless oil.

$\delta_{\text{H}}$  (300 MHz,  $\text{CDCl}_3$ ) 0.86-0.92 (2H, m), 0.94-1.00 (2H, m), 1.92-1.98 (1H, m), 2.17 (3H, s,  $\text{CH}_3\text{C}=\text{O}$ ), 2.40 (3H, s, Ar- $\text{CH}_3$ ), 4.01 (2H, s,  $\text{NCH}_2$ ), 4.34 (2H, s,  $\text{NCH}_2$ ), 7.30 (2H, d,  $J$  8.0,  $2 \times$  Ar- $H$ ), 7.68 (2H, d,  $J$  8.0,  $2 \times$  Ar- $H$ ).

$\delta_{\text{C}}$  (62.9 MHz,  $\text{CDCl}_3$ ) 11.6 ( $2 \times \text{CH}_2$ ), 18.1 (CH), 21.6 ( $\text{CH}_3$ ), 27.0 ( $\text{CH}_3$ ), 56.6 ( $\text{CH}_2$ ), 56.7 ( $\text{CH}_2$ ), 127.4 ( $2 \times \text{CH}$ ), 129.7 ( $2 \times \text{CH}$ ), 136.1 (C), 143.8 (C), 203.4 (C), 205.0 (C).

$\nu_{\text{max}}$  ( $\text{cm}^{-1}$ , film) 2924, 1712, 1597, 1335, 1155.

$m/z$  (FAB) 310.1112 ( $\text{MH}^+$ .  $\text{C}_{15}\text{H}_{20}\text{NO}_4\text{S}$  requires 310.1113)

### *N,N*-bis(2-Cyclopropyl-2-oxoethyl)-4-toluenesulfonamide (**2**)

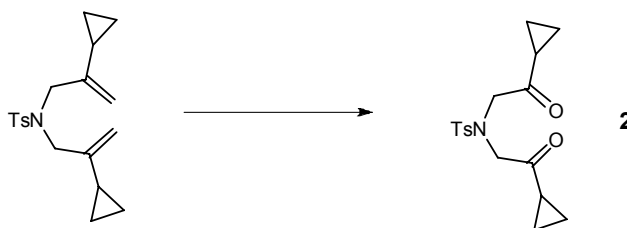

The general ozonolysis procedure gave **2** in 98% yield as a colourless oil.

$\delta_{\text{H}}$  (300 MHz,  $\text{CDCl}_3$ ) 0.90-0.97 (4H, m), 0.98-1.04 (4H, m), 1.90-2.01 (2H, m), 2.42 (3H, s, Ar- $\text{CH}_3$ ), 4.33 (4H, s,  $2 \times \text{NCH}_2$ ), 7.29 (2H, d,  $J$  8.2,  $2 \times$  Ar- $H$ ), 7.70 (2H, d,  $J$  8.2,  $2 \times$  Ar- $H$ ).

$\delta_{\text{C}}$  (62.9 MHz,  $\text{CDCl}_3$ ) 11.6 ( $4 \times \text{CH}_2$ ), 18.1 ( $2 \times \text{CH}$ ), 21.6 ( $\text{CH}_3$ ), 56.5 ( $2 \times \text{CH}_2$ ), 127.4 ( $2 \times \text{CH}$ ), 129.6 ( $2 \times \text{CH}$ ), 136.4 (C), 143.2 (C), 205.2 ( $2 \times \text{C}$ ).

$\nu_{\text{max}}$  ( $\text{cm}^{-1}$ , film) 2921, 1707, 1598, 1335, 1156.

$m/z$  (FAB) 336.1268 ( $\text{MH}^+$ .  $\text{C}_{17}\text{H}_{22}\text{NO}_4\text{S}$  requires 336.1270)

### *N*-(Butyl)-*N*-(2-cyclopropyl-2-oxoethyl)-4-toluenesulfonamide (**3**)

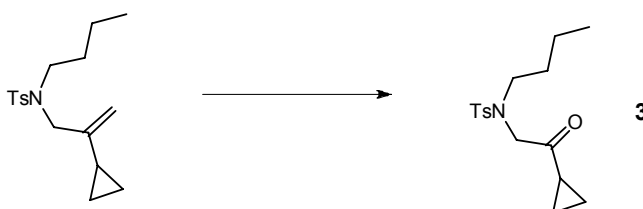

The general ozonolysis procedure gave **3** in 89% yield as a colourless oil.

$\delta_{\text{H}}$  (300 MHz,  $\text{CDCl}_3$ ) 0.86 (3H, t,  $J$  7.2,  $\text{CH}_3\text{CH}_2$ ), 0.93-0.96 (2H, m), 1.01-1.07 (2H, m), 1.26 (2H, app sextet,  $J$  7.2,  $\text{CH}_3\text{CH}_2$ ), 1.45-1.50 (2H, m), 2.20-2.28 (1H, m), 2.43 (3H, s, Ar- $\text{CH}_3$ ), 3.15 (2H, t (2<sup>nd</sup> order),  $J$  7.2,  $\text{NCH}_2\text{CH}_2$ ), 4.01 (2H, s,  $\text{NCH}_2\text{CO}$ ), 7.31 (2H, d,  $J$  8.4,  $2 \times$  Ar- $H$ ), 7.72 (2H, d,  $J$  8.4,  $2 \times$  Ar- $H$ ).

$\delta_{\text{C}}$  (62.9 MHz,  $\text{CDCl}_3$ ) 12.1 ( $2 \times \text{CH}_2$ ), 13.7 ( $\text{CH}_3$ ), 17.8 (CH), 19.9 ( $\text{CH}_2$ ), 21.6 ( $\text{CH}_3$ ), 29.7 ( $\text{CH}_2$ ), 49.1 ( $\text{CH}_2$ ), 57.2 ( $\text{CH}_2$ ), 127.3 ( $2 \times \text{CH}$ ), 129.6 ( $2 \times \text{CH}$ ), 136.6 (C), 143.5 (C), 206.7 (C).

$\nu_{\text{max}}$  ( $\text{cm}^{-1}$ , film) 2927, 1707, 1598, 1330, 1155.

$m/z$  (FAB) 310.1475 ( $\text{MH}^+$ .  $\text{C}_{16}\text{H}_{24}\text{NO}_3\text{S}$  requires 310.1477)

### General Procedure for $\text{SmI}_2$ reactions

To a  $-78^\circ\text{C}$  solution of  $\text{SmI}_2$  (1.8 mmol; prepared<sup>2</sup> from Sm (0.32 g, 2.12 mmol) and  $\text{CH}_2\text{I}_2$  (0.14 ml, 1.8 mmol) in degassed THF (18 ml)) was added *via* canula a solution of the ketone (0.72 mmol) and <sup>t</sup>BuOH (0.2 ml, 2.1 mmol) in degassed THF (3 ml). The reaction was stirred for 16 h whilst warming to room temperature and then poured into saturated aqueous sodium bicarbonate (50 ml) and water (50 ml). The organic species were extracted with ethyl acetate

(3 x 50 ml) and the extracts washed respectively with sodium thiosulphate (10% solution, 50 ml) and saturated sodium chloride (50 ml). The combined extracts were dried ( $\text{Na}_2\text{SO}_4$ ) and evaporated under reduced pressure. The crude material was analysed by  $^1\text{H}$  &  $^{13}\text{C}$  NMR and MS before being purified by flash column chromatography on silica as stated below.

#### *cis* 3-Cyclopropyl-4-methyl-1-tosylpyrrolidine-3,4-diol (**4**)

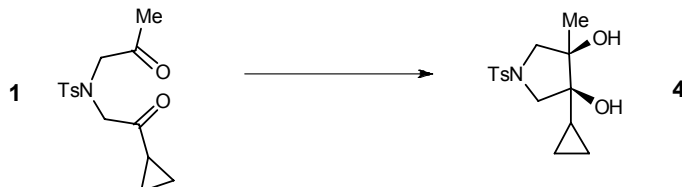

Reaction of diketone **1** with  $\text{SmI}_2$ - $t$ -BuOH using the standard procedure gave, after purification by flash column chromatography on silica using petrol:EtOAc (80:20  $\rightarrow$  50:50), **4** in 73% yield as a colourless oil.

$\delta_{\text{H}}$  (300 MHz,  $\text{CDCl}_3$ ) 0.27-0.37 (4H, m), 0.61-0.68 (1H, m), 1.18 (3H, s,  $\text{CH}_3$ ), 2.35 (3H, s, Ar- $\text{CH}_3$ ), 3.14 (1H, d,  $J$  10.5, NCHH), 3.23 (1H, d,  $J$  10.5, NCHH), 3.29 (2H, s,  $\text{NCH}_2$ ), 7.25 (2H, d,  $J$  8.4,  $2 \times$  Ar- $H$ ), 7.63 (2H, d,  $J$  8.4,  $2 \times$  Ar- $H$ ).

$\delta_{\text{C}}$  (62.9 MHz,  $\text{CDCl}_3$ ) 0.0 ( $2 \times \text{CH}_2$ ), 0.5 (CH), 12.7 ( $\text{CH}_3$ ), 20.6 ( $\text{CH}_3$ ), 55.5 ( $\text{CH}_2$ ), 57.6 ( $\text{CH}_2$ ), 78.3 (C), 78.5 (C), 127.0 ( $2 \times \text{CH}$ ), 129.2 ( $2 \times \text{CH}$ ), 133.2 (C), 143.2 (C).

$\nu_{\text{max}}$  ( $\text{cm}^{-1}$ , film) 3479 (br), 1597, 1336, 1154.

$m/z$  (FAB) 312.1270 ( $\text{MH}^+$ .  $\text{C}_{15}\text{H}_{22}\text{NO}_4\text{S}$  requires 312.1270)

#### *cis* 3,4-Dicyclopropyl-1-tosylpyrrolidine-3,4-diol (**6**)

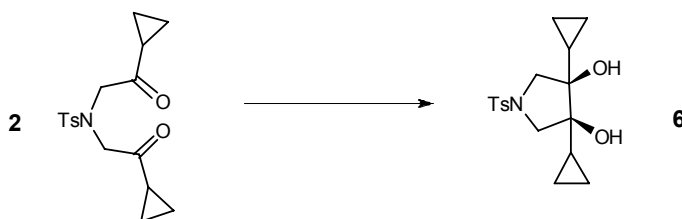

Reaction of diketone **2** with  $\text{SmI}_2$ - $t$ -BuOH using the standard procedure gave, after purification by flash column chromatography on silica using petrol:EtOAc (80:20  $\rightarrow$  50:50), **6** in 71% yield as a colourless oil.

$\delta_{\text{H}}$  (300 MHz,  $\text{CDCl}_3$ ) 0.36-0.48 (8H, m), 0.91-0.99 (2H, m), 2.39 (3H, s, Ar- $\text{CH}_3$ ), 2.54 (2H, br s,  $2 \times \text{OH}$ ), 3.23 (2H, d,  $J$  10.3,  $2 \times$  NCHH), 3.34 (2H, d,  $J$  10.3,  $2 \times$  NCHH), 7.31 (2H, d,  $J$  8.2,  $2 \times$  Ar- $H$ ), 7.70 (2H, d,  $J$  8.2,  $2 \times$  Ar- $H$ ).

$\delta_{\text{C}}$  (62.9 MHz,  $\text{CDCl}_3$ ) 0.2 ( $2 \times \text{CH}_2$ ), 0.5 ( $2 \times \text{CH}_2$ ), 13.5 ( $2 \times \text{CH}$ ), 21.4 ( $\text{CH}_3$ ), 56.2 ( $2 \times \text{CH}_2$ ), 79.4 ( $2 \times \text{C}$ ), 127.3 ( $2 \times \text{CH}$ ), 129.5 ( $2 \times \text{CH}$ ), 133.8 (C), 143.4 (C).

$\nu_{\text{max}}$  ( $\text{cm}^{-1}$ , film) 3485 (br), 2934, 1598, 1343, 1158.

$m/z$  (FAB) 338.1426 ( $\text{MH}^+$ .  $\text{C}_{17}\text{H}_{24}\text{NO}_4\text{S}$  requires 338.1426)

Found: C, 60.6; H, 7.0; N, 4.2%; Calc. for  $\text{C}_{17}\text{H}_{23}\text{NO}_4\text{S}$ : C, 60.5; H, 6.9; N, 4.2%.

#### *N*-butyl-*N*-(2-oxopentyl)-4-toluenesulfonamide (**7**)

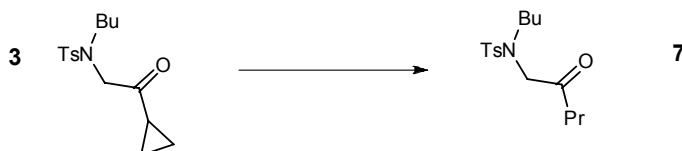

Reaction of ketone **3** with  $\text{SmI}_2$ - $t$ -BuOH using the standard procedure gave, after purification by flash column chromatography on silica using petrol:diethyl ether (80:20  $\rightarrow$  50:50), **7** in 10% yield as a colourless oil, together with recovered **3** (60%).

$\delta_{\text{H}}$  (300 MHz,  $\text{CDCl}_3$ ) 0.83 (3H, t,  $J$  7.2,  $\text{CH}_3\text{CH}_2$ ), 0.85 (3H, t,  $J$  7.2,  $\text{CH}_3\text{CH}_2$ ) 1.21-1.32 (2H, m), 1.40-1.48 (2H, m), 1.51-1.64 (2H, m), 2.43 (3H, s, Ar- $\text{CH}_3$ ), 2.51 (2H, t  $J$  7.2,  $\text{CH}_2\text{CH}_2\text{CO}$ ), 3.11 (2H, t (2<sup>nd</sup> order),  $J$  7.2,  $\text{NCH}_2\text{CH}_2$ ), 3.92 (2H, s,  $\text{NCH}_2\text{CO}$ ), 7.33 (2H, d,  $J$  8.2,  $2 \times$  Ar- $H$ ), 7.69 (2H, d,  $J$  8.2,  $2 \times$  Ar- $H$ ).

$\delta_{\text{C}}$  (62.9 MHz,  $\text{CDCl}_3$ ) 13.6 ( $2 \times$   $\text{CH}_3$ ), 16.9 ( $\text{CH}_2$ ), 19.9 ( $\text{CH}_2$ ), 21.5 ( $\text{CH}_3$ ), 30.0 ( $\text{CH}_2$ ), 41.3 ( $\text{CH}_2$ ), 48.9 ( $\text{CH}_2$ ), 56.3 ( $\text{CH}_2$ ), 127.4 ( $2 \times$  CH), 129.6 ( $2 \times$  CH), 136.3 (CH), 143.5 (CH), 206.5 (C).

$\nu_{\text{max}}$  ( $\text{cm}^{-1}$ , film) 2931, 1730, 1599, 1337, 1156.

$m/z$  (FAB) 312.1633 ( $\text{MH}^+$ .  $\text{C}_{16}\text{H}_{26}\text{NO}_3\text{S}$  requires 312.1633)

#### References:

- 1 D. D. Penin and W. L. F. Armarego, *Purification of Laboratory Chemicals*, 3<sup>rd</sup> Ed, Pergamon Press, NY, (1988).
2. G. A. Molander and C. Kenny, *J. Org. Chem.*, 1991, **56**, 1439.
3. S. Handa, M. S. Kachala and S. R. Lowe, *Tetrahedron Lett.*, 2004, **45**, 253.
4. J. Salaün, *J. Org. Chem.*, 1978, **43**, 2809.
